# Supplementary material
Source: publisher figshare collection journal article supplement (https://gsapubs.figshare.com/articles/dataset/_/14524173)
Supplement: Supplementary file 1 [file 2]

## Sheet: geochemical data
TABLE S1. Geochemical data from 2018 and 2019 field seasons.
Site	Site Number (Fig. 1)	Date	SO4-2 (mg/L)*	Cl- (mg/L)*	δ18O SO4-2 (‰)	δ34S SO4-2 (‰)	δ18O H2O (‰)	Lat (°S)	Long (°W)	Filter type	Lab or field loaded onto column	Water Isotope Analyzer†
Kosñipata @ San Pedro	B	2018-08-18	27.8	0.1	3.6 ± 0.5	0.7 ± 0.3	-11.3 ± 0.1	13.0583	71.5456	0.2 µm Nylon	Lab	LGR
Alto Madre de Dios	D, 1A	2018-08-20	12.3	0.4	2.5 ± 0.5	0.1 ± 0.3	-8.3 ± 0.1	12.8873	71.3574	0.7 µm Glass Fiber	Lab	Picarro
MDD @ Los Amigos	E, 6	2018-08-12	7.4	0.3	4.3 ± 0.5	4.8 ± 0.3	-6.6 ± 0.1	12.5698	70.1008	0.7 µm Glass Fiber	Lab	LGR
Kosñipata @ San Pedro	B	2019-01-25	16.6	0.1	0.2 ± 0.5	N.D.	-12.0 ± 0.1	13.0583	71.5456	0.2 µm Nylon	Field	Picarro
Alto Madre de Dios	D, 1A	2019-01-26	8.4	0.2	1.3 ± 1.3	-1.5 ± 0.1	-10.5 ± 0.1	12.8873	71.3574	0.7 µm Glass Fiber	Field	Picarro
MDD @ Los Amigos	E, 6	2019-01-16	6.3	0.2	2.1 ± 0.5	0.3 ± 0.1	-8.2 ± 0.1	12.5698	70.1008	0.7 µm Glass Fiber	Field	Picarro
Wayqecha	A	2019-03-10	38.79	0.2	0.8 ± 0.7	N.D.	-13.2 ± 0.1	13.1618	71.5888	0.2 µm Nylon	Field	Picarro
Kosñipata @ San Pedro	B	2019-03-11	15.27	0.2	1 ± 0.5	N.D.	-12.0 ± 0.1	13.0583	71.5456	0.7 µm Glass Fiber	Field	Picarro
Kosñipata @ Pilcopata	C	2019-03-12	8.58	0.4	-1.1 ± 0.5	2.2 ± 0.3	-11.3 ± 0.1	12.9253	71.3951	0.7 µm Glass Fiber	Field	Picarro
Hot Spring	2	2019-03-13	6	147.3	-0.4 ± 0.5	7.6 ± 0.3	N.D.	12.6686	71.2698	0.2 µm Nylon	Field	Picarro
Alto Madre de Dios	D, 1A/B	2019-03-13	7.8	0.5	-1.7 ± 0.5	-1.6 ± 0.3	-10.6 ± 0.1	12.8873	71.3574	0.7 µm Glass Fiber	Field	Picarro
Rio Manu	3	2019-03-14	2.94	0.3	5.6 ± 0.5	5.8 ± 0.3	-8.4 ± 0.1	12.2713	70.9344	0.7 µm Glass Fiber	Field	Picarro
Rio Chilibe	4	2019-03-15	0.99	0.3	3.7 ± 0.5	-2.8 ± 0.3	-8.1 ± 0.1	12.4957	70.5998	0.7 µm Glass Fiber	Field	Picarro
Rio Colorado	5	2019-03-15	1.47	0.2	6.7 ± 0.5	6.2 ± 0.3	-8.4 ± 0.1	12.6093	70.4117	0.7 µm Glass Fiber	Field	Picarro
MDD @ Los Amigos	E, 6	2019-03-16	4.41	0.2	0.5 ± 0.5	1.3 ± 0.3	-8.8 ± 0.1	12.5698	70.1008	0.7 µm Glass Fiber	Field	Picarro
Wayqecha	A	2019-05-14	N.D.	N.D.	-0.3 ± 0.5	N.D.	N.D.	13.1618	71.5888	0.2 µm Nylon	Field	Picarro
Kosñipata @ San Pedro	B	2019-05-17	21.21	0.1	3.5 ± 0.5	-0.8 ± 0.3	-12.2 ± 0.1	13.0583	71.5456	0.2 µm Nylon	Field	Picarro
Kosñipata @ Pilcopata	C	2019-05-18	11.49	0.3	-0.5 ± 0.5	-0.2 ± 0.3	-11.0 ± 0.1	12.9253	71.3951	0.7 µm Glass Fiber	Field	Picarro
Alto Madre de Dios	D, 1A/B	2019-05-23	10.36	0.2	1.5 ± 0.5	-0.6 ± 0.3	-9.2 ± 0.1	12.8873	71.3574	0.7 µm Glass Fiber	Field	Picarro
Hot Spring	2	2019-05-22	6.321	139.8	3.3 ± 0.5	8.8 ± 0.3	N.D.	12.6686	71.2698	0.2 µm Nylon	Field	Picarro
Rio Manu	3	2019-05-23	9.64	0.2	10.5 ± 0.5	6.8 ± 0.3	-7.2 ± 0.1	12.2713	70.9344	0.7 µm Glass Fiber	Field	Picarro
Rio Chilibe	4	2019-05-24	0.634	0.1	3.3 ± 0.5	0.2 ± 0.3	-6.9 ± 0.1	12.4957	70.5998	0.7 µm Glass Fiber	Field	Picarro
Rio Colorado	5	2019-05-24	1.057	0.2	6.8 ± 0.5	5.0 ± 0.3	-7.3 ± 0.1	12.6093	70.4117	0.7 µm Glass Fiber	Field	Picarro
MDD @ Los Amigos	E, 6	2019-05-24	5.872	0.2	4.2 ± 0.5	N.D.	-7.8 ± 0.1	12.5698	70.1008	0.7 µm Glass Fiber	Lab	Picarro
*Aug., Jan. and May anions measured via Metrohm 850 Ion Chromatography at the University of Southern California (Analytical precision 7% or better from SUPER 05 Certified Reference Material from Environment Canada (lot 0815)). Mar. anions measured at Durham University via Dionex ICS3000 Ion Chromatography system (Analytical precision 2% or better from replicate analyses of reference materials)
† δ18O H2O was measured on the Los Gatos Research Liquid Water Isotope Analyzer at Lawrence Berkeley National Lab or Picarro L2130i cavity ring down spectrometer at Chapman University. Replicate analyses of in house reference materials for both instruments reveal analytical precision of 0.1 ‰ or better.
